# Supplementary material for: Pisa Syndrome in Parkinson’s Disease: Pathogenic Roles of Verticality Perception Deficits
Source: PubMed Central journal article supplement (PMC5788854; doi:10.1038/s41598-018-20129-2), 2018-01-29
Supplement: 41598_2018_20129_MOESM1_ESM.pdf [file 41598_2018_20129_MOESM1_ESM.pdf]

# Pisa Syndrome in Parkinson's Disease: Pathogenic Roles of Verticality Perception Deficits

Young Eun Huh<sup>1</sup>, Kunhyun Kim<sup>2</sup>, Won-Ho Chung<sup>3</sup>, Jinyoung Youn<sup>2</sup>, Seonwoo Kim<sup>4</sup>, Jin Whan Cho<sup>2,\*</sup>

<sup>1</sup>Department of Neurology, CHA Bundang Medical Center, CHA University, Seongnam, 13496, Korea

<sup>2</sup>Department of Neurology, Sungkyunkwan University School of Medicine, Samsung Medical Center, Seoul, 06351, Korea

<sup>3</sup>Department of Otolaryngology, Head and Neck Surgery, Sungkyunkwan University School of Medicine, Samsung Medical Center, Seoul, 06351, Korea

<sup>4</sup>Statistics and Data Center, Samsung Medical Center, Seoul, 06351, Korea

\* email: [jinwhan.cho@samsung.com](mailto:jinwhan.cho@samsung.com)

*Supplementary information:* Supplementary Table

|                                                     |                                    | <b>PD-PS with unilateral CP<br/>(n=8)</b> |
|-----------------------------------------------------|------------------------------------|-------------------------------------------|
| <b>Age (years)</b>                                  |                                    | 66.0 (53.8-78.3)                          |
| <b>Male gender (%)</b>                              |                                    | 3 (37.5)                                  |
| <b>Disease duration (years)</b>                     |                                    | 14.0 (4.8-23.3)                           |
| <b>Hoehn and Yahr stage</b>                         |                                    | 2.5 (2-3)                                 |
| <b>UPDRS-III</b>                                    |                                    | 24.5 (12.0-37.0)                          |
| <b>PD motor subtype (PIGD/TD)</b>                   |                                    | 4/4                                       |
| <b>Degree of PS (°)</b>                             |                                    | 14.0 (10-18)                              |
| <b>Direction of PS (R/L)</b>                        |                                    | 4 (50.0)                                  |
| <b>Abnormal SVV (%)</b>                             |                                    | 6 (75.0)                                  |
|                                                     | <b>Direction of SVV (R/L)</b>      | 1/5                                       |
|                                                     | <b>Ipsiversive SVV</b>             | 4                                         |
| <b>Asymmetry of motor symptoms</b>                  |                                    | 4.0 (0.2-7.8)                             |
| <b>PS tilting to the less affected hemibody (%)</b> |                                    | 2 (25.0)                                  |
| <b>Dominant side of motor symptoms (R/L)</b>        |                                    | 4/4                                       |
| <b>CP (%)</b>                                       |                                    | 8 (100.0)                                 |
|                                                     | <b>Side of CP (R/L)</b>            | 4/4                                       |
|                                                     | <b>Ipsilateral CP</b>              | 8                                         |
| <b>EMG patterns of paraspinal muscles (%)</b>       |                                    |                                           |
|                                                     | <b>Contralateral hyperactivity</b> | 3 (37.5)                                  |
|                                                     | <b>Bilateral hyperactivity</b>     | 5 (62.5)                                  |
| <b>Back pain (%)</b>                                |                                    | 3 (37.5)                                  |
| <b>BBS</b>                                          |                                    | 47.0 (45.2-48.8)                          |
| <b>LEDD (mg)</b>                                    |                                    | 688.0 (499.2-876.8)                       |
| <b>Treatment regimen (%)</b>                        |                                    |                                           |
|                                                     | <b>Levodopa + dopamine agonist</b> | 7 (87.5)                                  |
|                                                     | <b>Levodopa</b>                    | 0                                         |
|                                                     | <b>Dopamine agonist</b>            | 1 (12.5)                                  |
| <b>BMI (kg/m<sup>2</sup>)</b>                       |                                    | 24.8 (20.3-29.3)                          |
| <b>MMSE</b>                                         |                                    | 27.5 (25.5-29.5)                          |
| <b>Education (years)</b>                            |                                    | 16.0 (7.5-24.5)                           |

**Supplementary table.** Demographic and clinical measurements in PD-PS with unilateral CP. Data are presented as median (interquartile range) unless otherwise noted. BBS: Berg Balance Scale, BMI: body mass index, CP: canal paresis, LEDD: levodopa equivalent daily dose, MMSE: Mini-Mental State Examination, PIGD: postural instability and gait disturbance, SVV: subjective visual vertical, TD: tremor dominant, UPDRS-III: Unified Parkinson's Disease Rating Scale motor score.
